# Supplementary material for: On the origin and diversification of Podolian cattle breeds: testing scenarios of European colonization using genome-wide SNP data
Source: PubMed Central journal article supplement (PMC8173809; doi:10.1186/s12711-021-00639-w), 2021-06-02

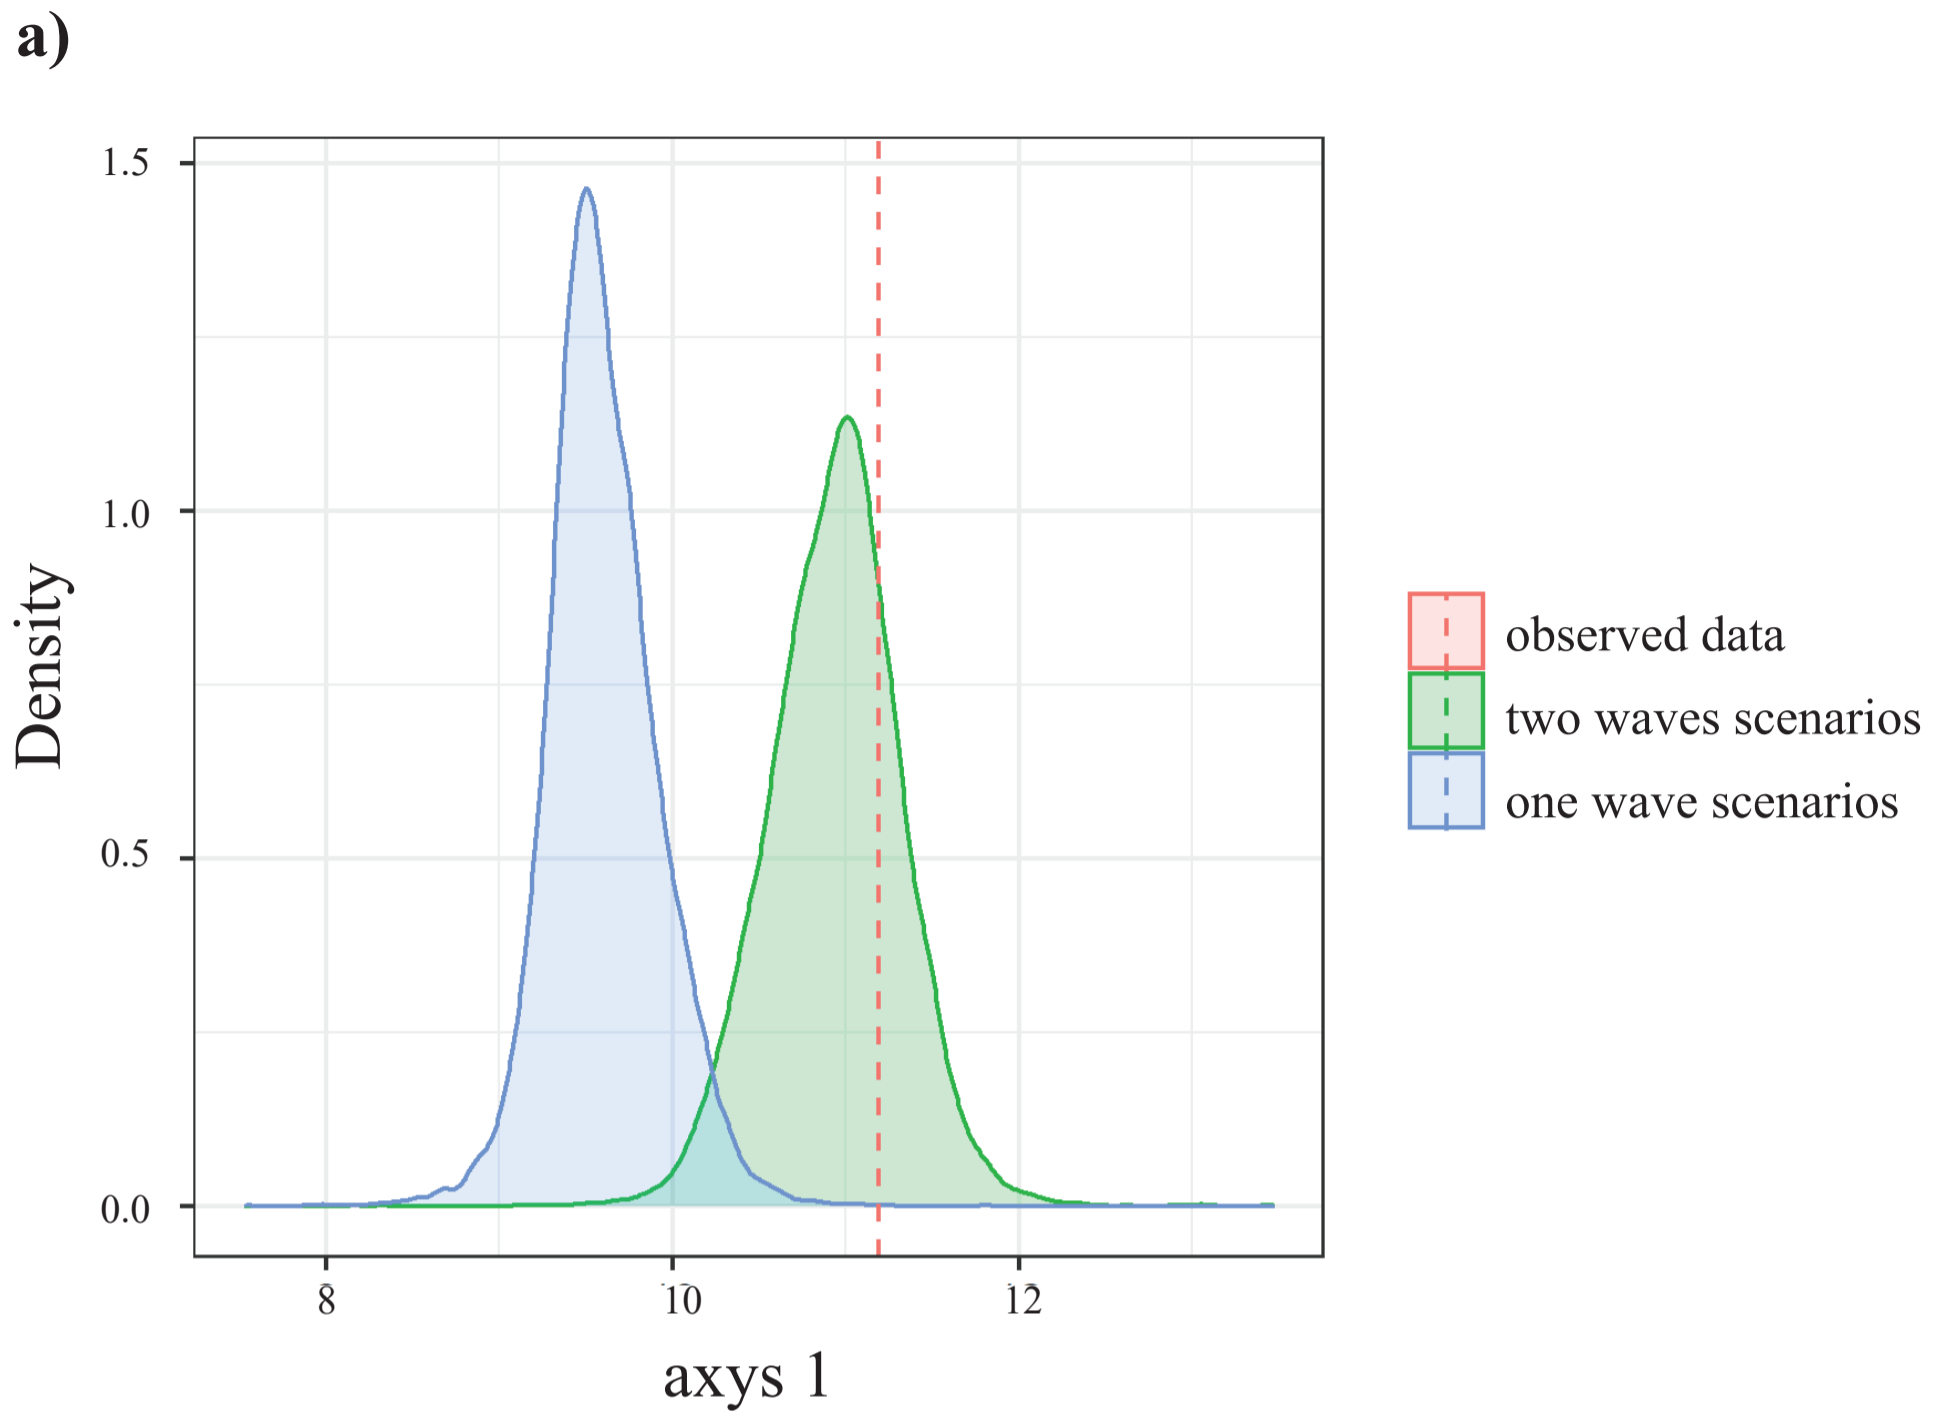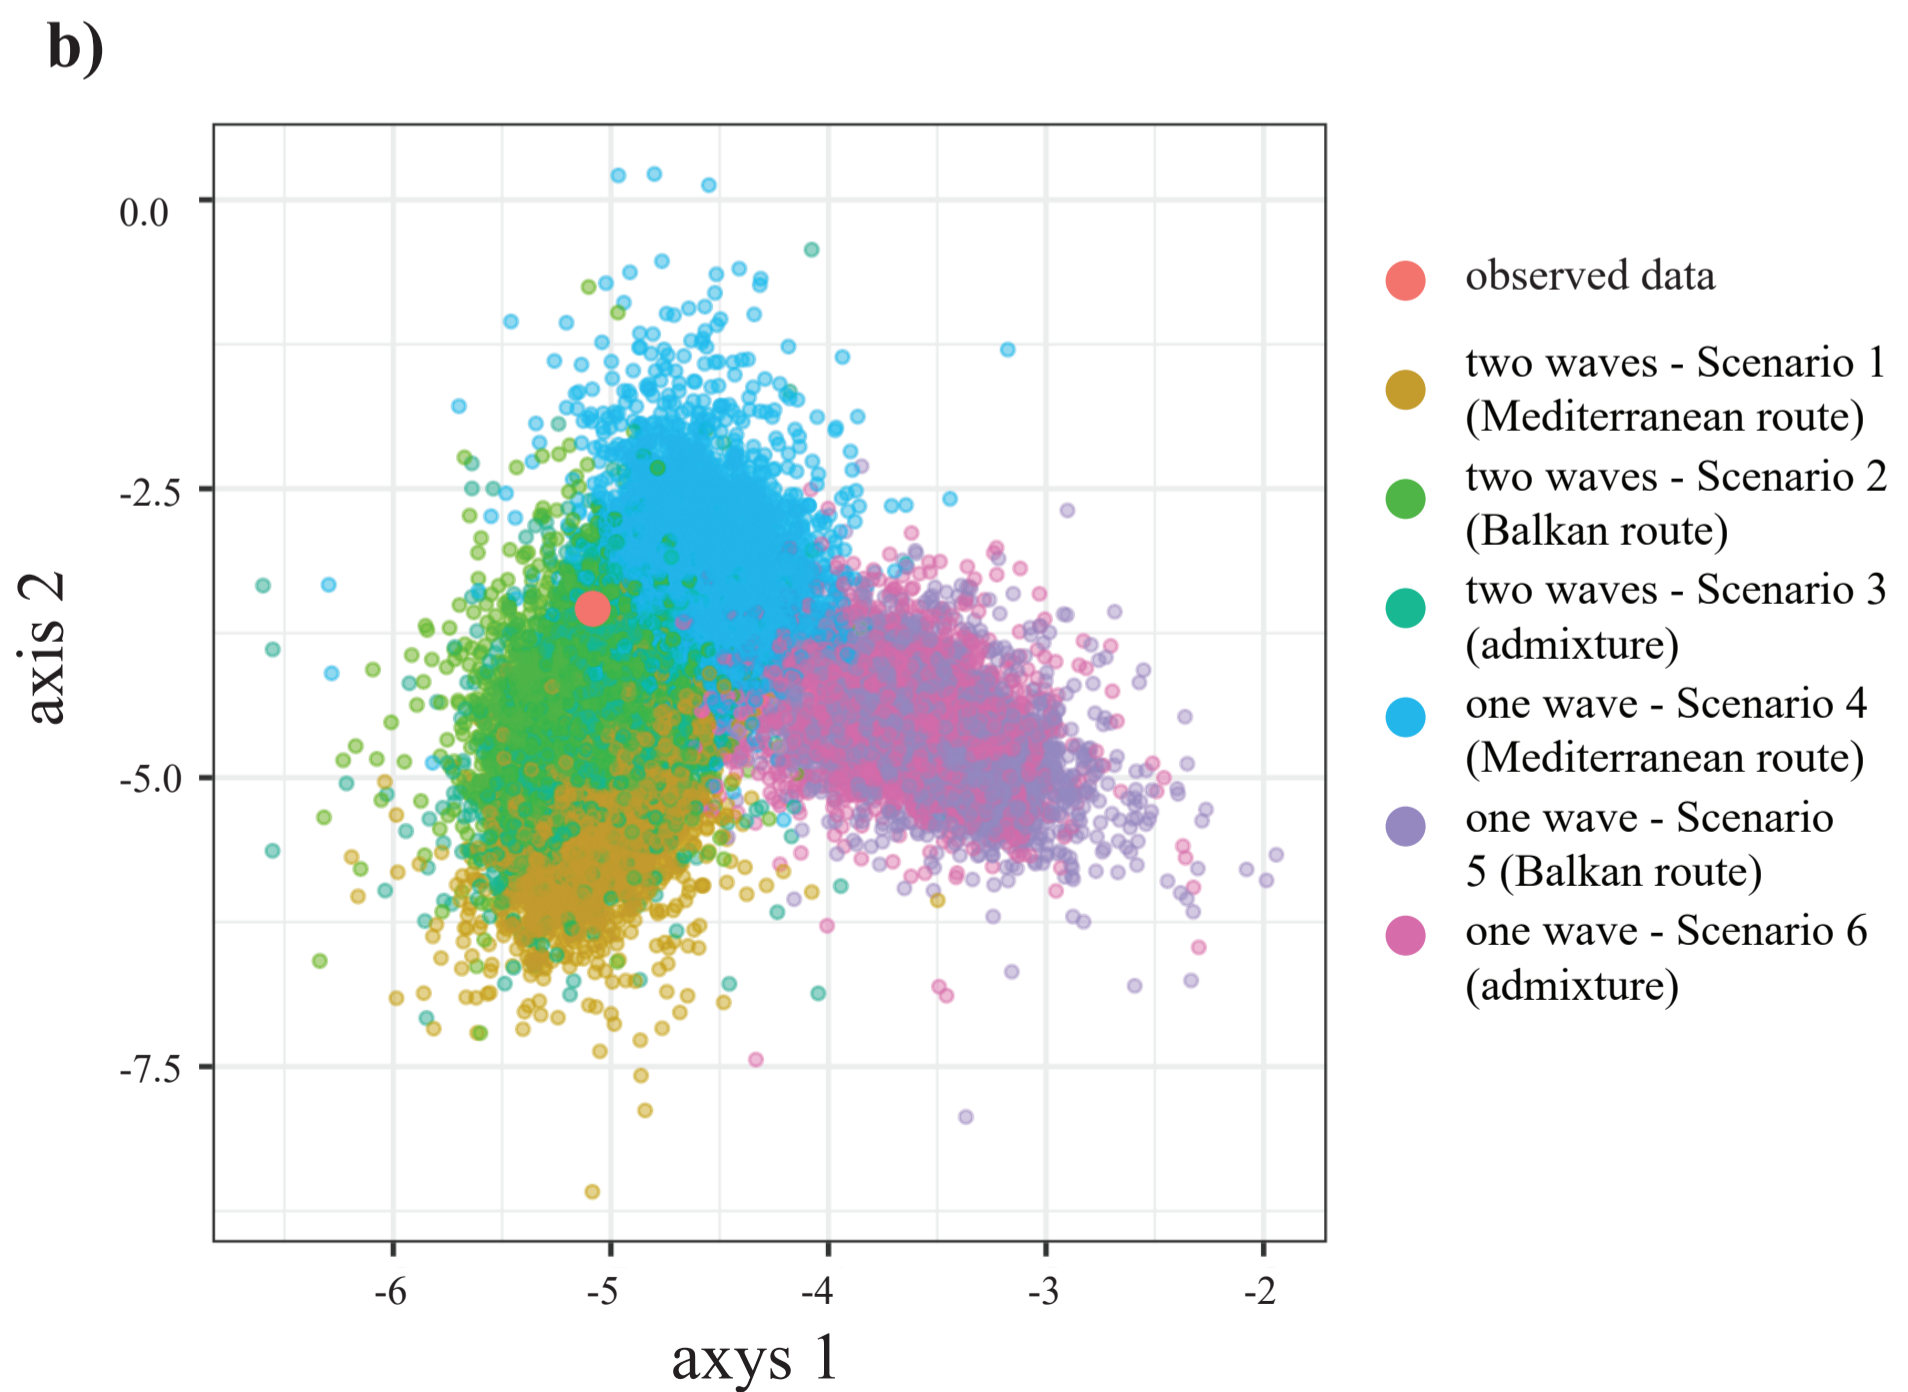

Supplement: 12711_2021_639_MOESM10_ESM.pdf [file 12711_2021_639_MOESM10_ESM.pdf]
